# Supplementary material for: Enhanced adsorption capacity of tetracycline on porous graphitic biochar with an ultra-large surface area
Source: Royal Society of Chemistry journal article supplement (doi:10.1039/d3ra00745f), 2023-01-01
Supplement: d3ra00745f1.pdf [file d3ra00745f1.pdf]

## Supporting Information

### **Enhanced adsorption capacity of tetracycline on porous graphitic biochar with an ultra-large surface area**

Bingyuan Huang <sup>a</sup>, Dan Huang <sup>b</sup>, Qian Zheng <sup>a</sup>, Changhan Yan <sup>a</sup>, Jiaping Feng <sup>a</sup>,

Hejun Gao <sup>a,\*</sup>, Hongquan Fu <sup>a,\*</sup>, Yunwen Liao <sup>a,\*a</sup>

*Chemical Synthesis and Pollution Control Key Laboratory of Sichuan Province, College of*

*Chemistry and Chemical Engineering, China West Normal University, Nanchong, Sichuan*

*637000, China*

*<sup>b</sup> People's Hospital of Gaoping District, Nanchong, Sichuan 637100, China*

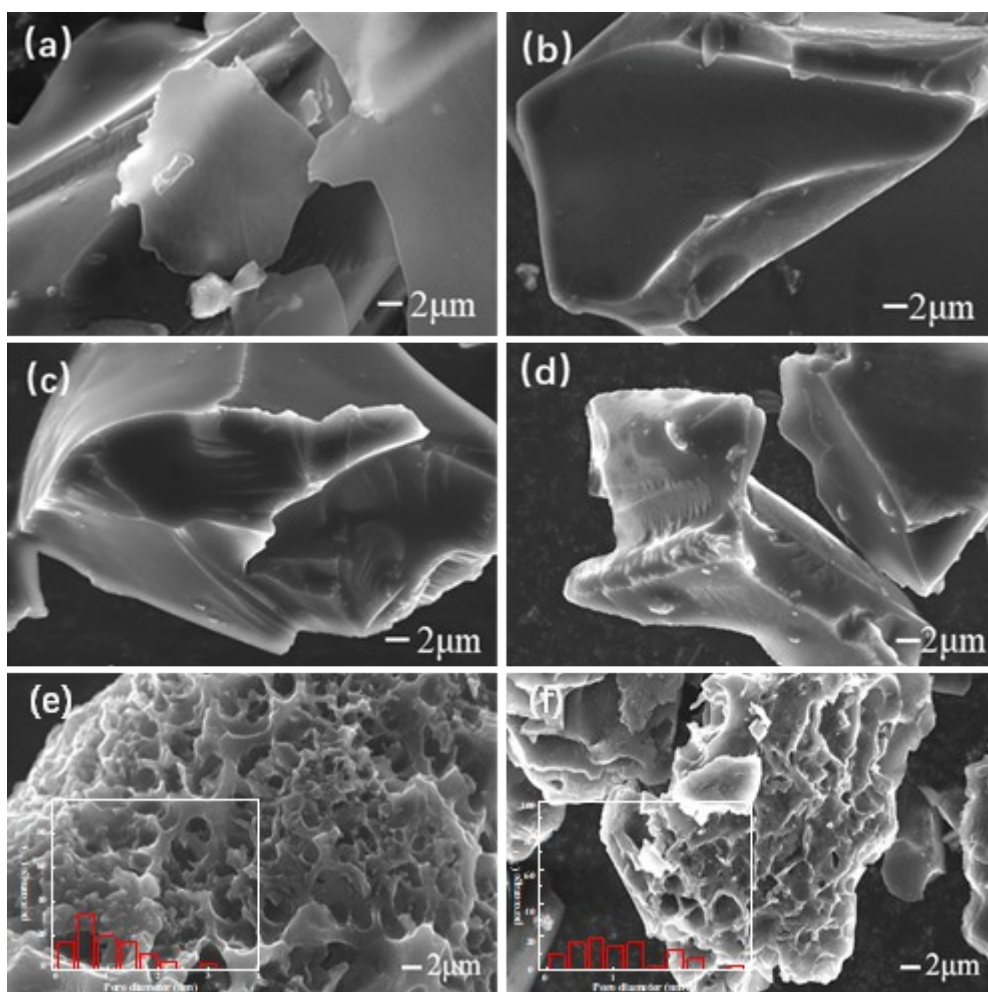

**Fig. S1.** SEM image of samples: BC<sub>800</sub> (a); BC<sub>2-800-0.5</sub> (b); BC<sub>2-800-1</sub> (c); BC<sub>2-800-2</sub> (d); BC<sub>2-800-4</sub> (e); BC<sub>2-800-6</sub> (f).

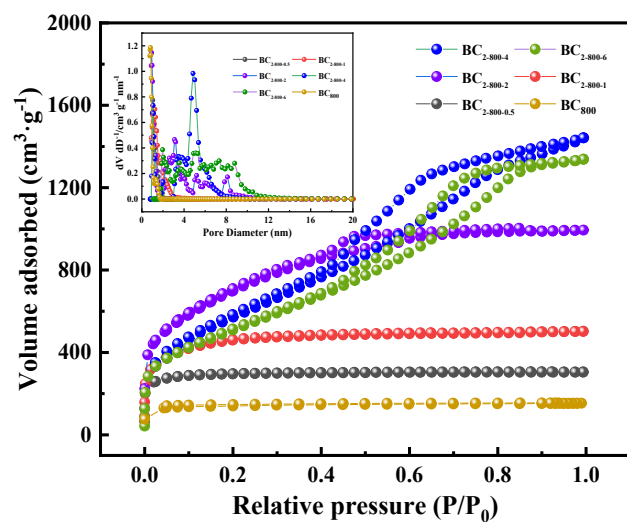

**Fig. S2.** N<sub>2</sub> adsorption-desorption isotherms and the pore-size distribution curves of BC<sub>800</sub>, BC<sub>2-800-0.5</sub>, BC<sub>2-800-1</sub>, BC<sub>2-800-2</sub>, BC<sub>2-800-4</sub>, BC<sub>2-800-6</sub>.

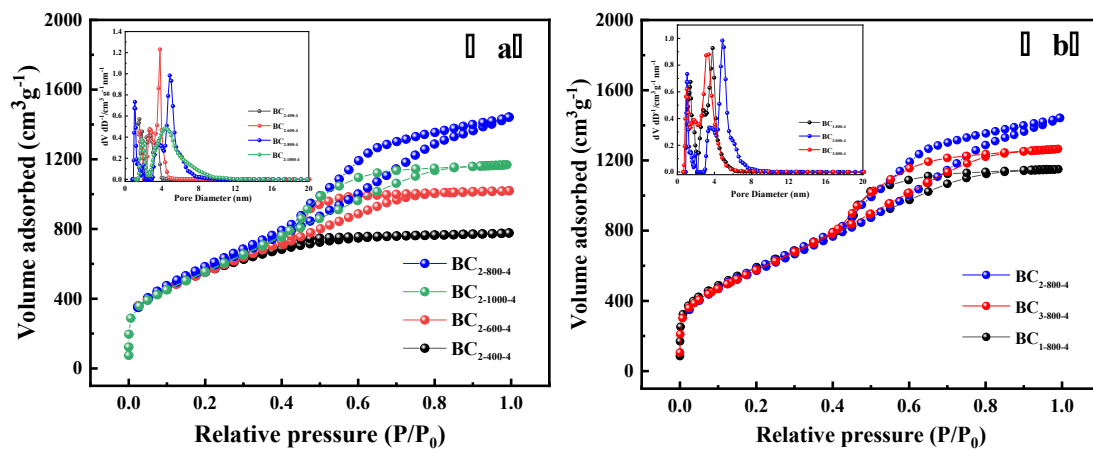

**Fig. S3.**  $N_2$  adsorption-desorption isotherms and the pore-size distribution curves (a) of  $BC_{2-400-4}$ ,  $BC_{2-600-4}$ ,  $BC_{2-800-4}$ ,  $BC_{2-1000-4}$ ,  $N_2$  adsorption-desorption isotherms and the pore-size distribution curves (b) of  $BC_{1-800-4}$ ,  $BC_{2-800-4}$ ,  $BC_{3-800-4}$ .

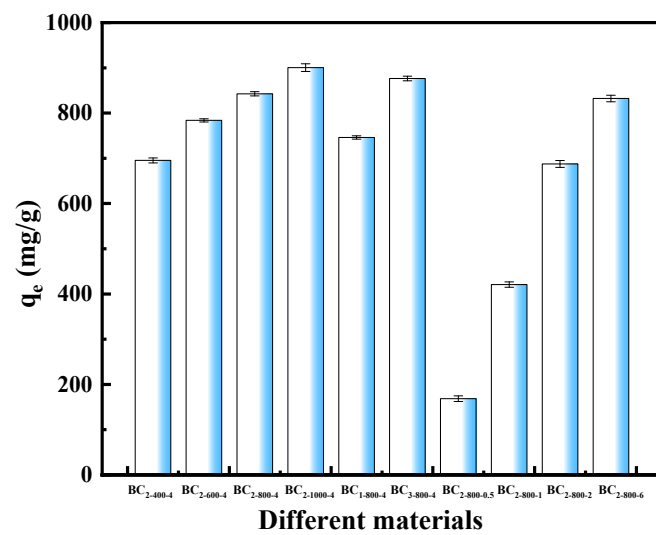

**Fig. S4.** Adsorption properties of BC<sub>x-y-z</sub>

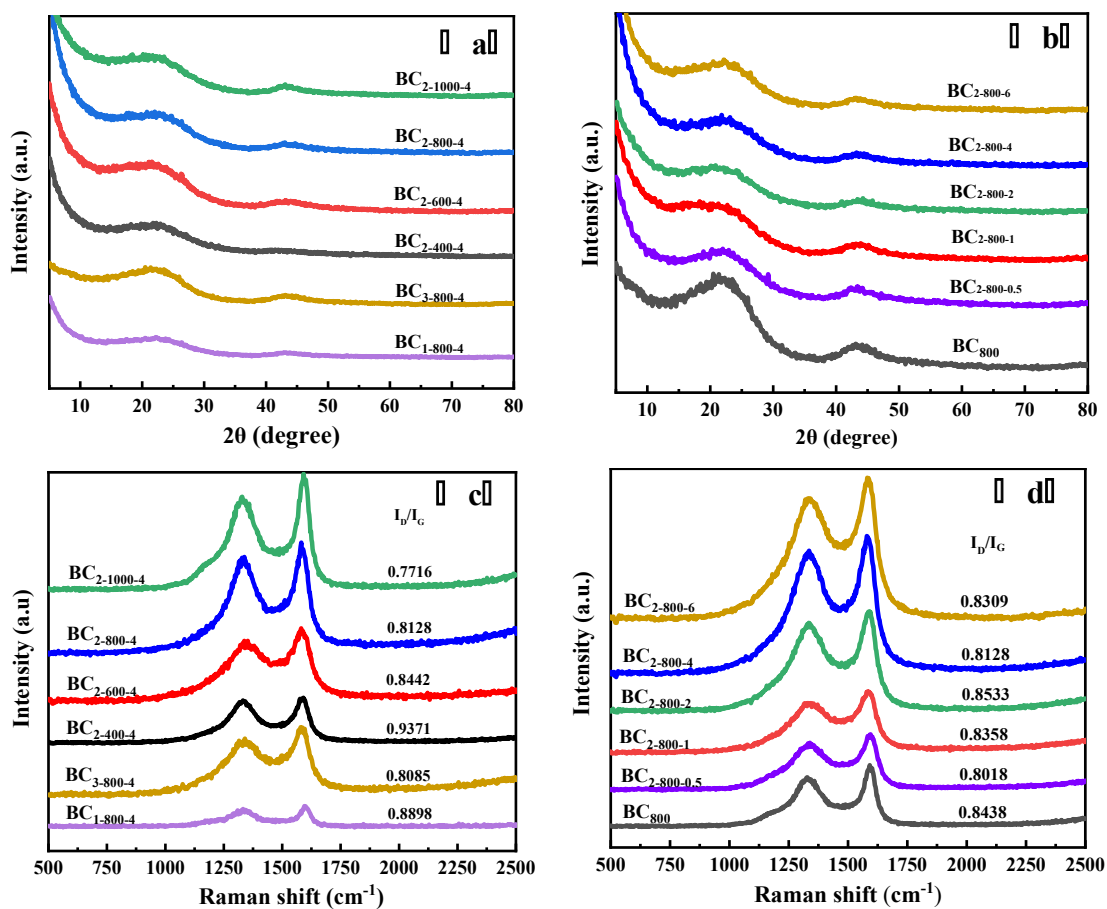

**Fig. S5.** (a) and (b) is the XRD patterns of BC<sub>2-400-4</sub>, BC<sub>2-600-4</sub>, BC<sub>2-800-4</sub>, BC<sub>2-1000-4</sub>, BC<sub>1-800-4</sub>, BC<sub>3-800-4</sub>, BC<sub>800</sub>, BC<sub>2-800-0.5</sub>, BC<sub>2-800-1</sub>, BC<sub>2-800-2</sub>, BC<sub>2-800-4</sub>, BC<sub>2-800-6</sub>. (c) and (d) is the Raman spectra of BC<sub>2-400-4</sub>, BC<sub>2-600-4</sub>, BC<sub>2-800-4</sub>, BC<sub>2-1000-4</sub>, BC<sub>1-800-4</sub>, BC<sub>3-800-4</sub>, BC<sub>800</sub>, BC<sub>2-800-0.5</sub>, BC<sub>2-800-1</sub>, BC<sub>2-800-2</sub>, BC<sub>2-800-4</sub>, BC<sub>2-800-6</sub>.

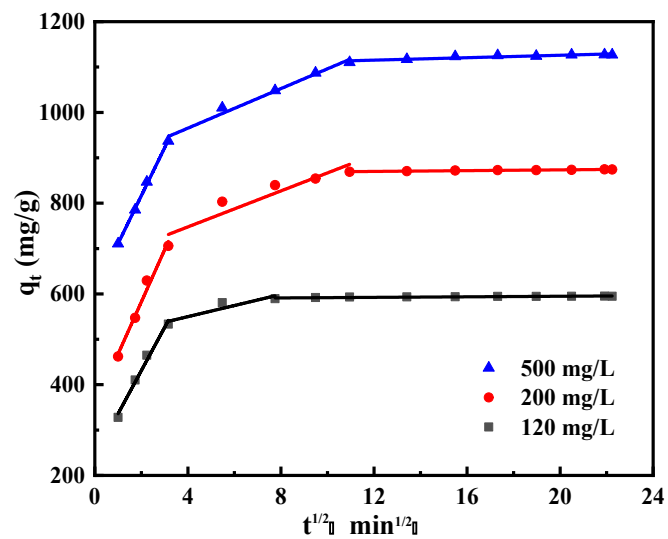

Fig. S6. Plots of the intra-particle diffusion model

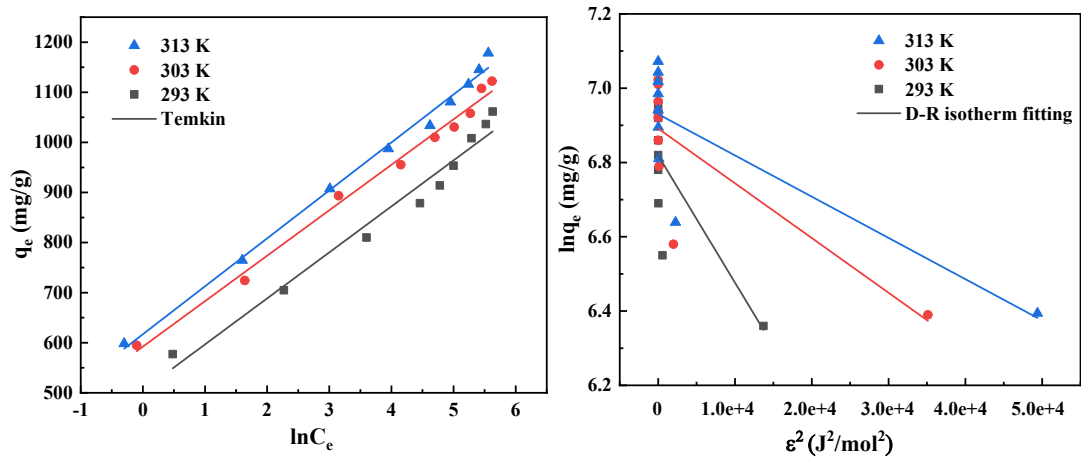

Fig. S7 (a) Temkin model and (b) Dubinin-Radushkevich model.



**Table S1**Experimental conditions for adsorption of TC by BC<sub>2-800-4</sub>

| influencing factor | TC volume (mL) | C <sub>0</sub> (mg/L) | solution pH | reaction time (min) | temperature (K) |
|--------------------|----------------|-----------------------|-------------|---------------------|-----------------|
| pH                 | 10             | 200                   | 2-11        | 240                 | 303             |
| kinetics           | 10             | 120、200、500           | 4           | 1-540               | 303             |
| isotherms          | 10             | 120-500               | 4           | 240                 | 293-313         |
| thermodynamics     | 10             | 120-500               | 4           | 240                 | 293-313         |
| ionic strength     | 10             | 200                   | 4           | 240                 | 303             |
| HA                 | 10             | 200                   | 4           | 240                 | 303             |

(The concentration of inorganic ions is 0.9, 4.5, and 9 mmol/L, respectively, and HA concentrations are 5, 10, 15, and 20 mg/L, respectively.)

**Table S2**

Information of kinetics, isotherm, thermodynamic model and other related formulas in this study.

| Type               | Model                    | Equation                                                                                                                         | Parameter                                                                                                                                                                                                                                                                                                                                                                                                                                                                                                                                                     |
|--------------------|--------------------------|----------------------------------------------------------------------------------------------------------------------------------|---------------------------------------------------------------------------------------------------------------------------------------------------------------------------------------------------------------------------------------------------------------------------------------------------------------------------------------------------------------------------------------------------------------------------------------------------------------------------------------------------------------------------------------------------------------|
| Analytical methods | Adsorption capacity      | $q_e = \frac{(C_0 - C_e)V}{m}$                                                                                                   | $q_e$ (mg/g) is the adsorption amount at equilibrium time; $C_0$ (mg/L) and $C_e$ (mg/L) are the TC concentration in solution at initial and equilibrium time; $V$ (L) is the solution volume; $m$ (g) is the mass of the composite.                                                                                                                                                                                                                                                                                                                          |
|                    | Removal rate             | $R\% = \frac{(C_0 - C_e)}{C_0} \times 100\%$                                                                                     |                                                                                                                                                                                                                                                                                                                                                                                                                                                                                                                                                               |
| Kinetics models    | Pseudo-first-order       | $Q_t = Q_e(1 - \exp(-k_1 t))$                                                                                                    | $Q_t$ (mg/g) is the adsorption capacity at time $t$ (min), $Q_e$ (mg/g) is the adsorption capacity at equilibrium time, $t$ is time (min), $K_1$ and $K_2$ are rates constant of pseudo-first order and pseudo-second order, respectively, $a$ is the rate constant of chemisorption, $b$ is constant of the surface coverage, $K_{id}$ (mg/(g·min <sup>1/2</sup> )) is the rate constant of the intra-particle diffusion model, $C$ (mg/g) is the constant of the intra-particle diffusion model                                                             |
|                    | Pseudo-second-order      | $Q_t = \frac{K_2 Q_e^2 t}{1 + K_2 Q_e t}$                                                                                        |                                                                                                                                                                                                                                                                                                                                                                                                                                                                                                                                                               |
|                    | Elovich                  | $Q_t = \frac{1}{b} \ln(1 + abt)$                                                                                                 |                                                                                                                                                                                                                                                                                                                                                                                                                                                                                                                                                               |
|                    | Intra-particle diffusion | $Q_t = K_{id} t^{0.5} + C$                                                                                                       |                                                                                                                                                                                                                                                                                                                                                                                                                                                                                                                                                               |
| Isotherm models    | Langmuir                 | $Q_e = \frac{Q_m K_L C_e}{1 + K_L C_e}$                                                                                          | $Q_m$ (mg/g) is the maximum adsorption capacity, $K_L$ (L/mg) is the Langmuir constant, and $K_F$ and $n$ are the Freundlich constant, respectively. $a_T$ is the equilibrium bond constant concerned with the maximum energy of the bond, $B$ and $b_T$ (J/mol) are the Temkin constant related to the sorption heat, $R$ is the universal gas constant, and $T$ is the Kelvin temperature. $\beta$ is the activity coefficient related to the mean free energy of sorption (mol <sup>2</sup> /J <sup>2</sup> ), and $\varepsilon$ is the Polanyi potential. |
|                    | Freundlich               | $Q_e = K_F C_e^{1/n}$                                                                                                            |                                                                                                                                                                                                                                                                                                                                                                                                                                                                                                                                                               |
|                    | Temkin                   | $B = \frac{RT}{b_T}$                                                                                                             |                                                                                                                                                                                                                                                                                                                                                                                                                                                                                                                                                               |
|                    | Dubinin-Radushkevich     | $\ln Q_e = \ln Q_d - \beta \varepsilon^2$<br>$\varepsilon = RT \ln(1 + \frac{1}{C_e})$                                           |                                                                                                                                                                                                                                                                                                                                                                                                                                                                                                                                                               |
| Thermodynamics     | Gibbs-Helmholtz equation | $\ln K_C = -\frac{\Delta H^0}{RT} + \frac{\Delta S^0}{R}$<br>$\Delta G^0 = \Delta H^0 - T \Delta S^0$<br>$K_C = \frac{Q_e}{C_e}$ | $K_C$ (L/mg) is thermodynamic equilibrium constant, $\Delta S^0$ (J/mol·K) is entropy change, $\Delta H^0$ (KJ/mol) is enthalpy change, $\Delta G^0$ (KJ/mol) is gibbs free energy.                                                                                                                                                                                                                                                                                                                                                                           |

**Table S3**

Porosity characteristic of different adsorbents

| Samples                 | BET Surface Area (m <sup>2</sup> /g) | Total Pore Volume(cm <sup>3</sup> /g) | Fractions of Micropores (%) | Average Pore Diameter (nm) |
|-------------------------|--------------------------------------|---------------------------------------|-----------------------------|----------------------------|
| BC <sub>800</sub>       | 372                                  | 0.21                                  | 100                         | 1.01                       |
| BC <sub>2-800-0.5</sub> | 870                                  | 0.42                                  | 41                          | 1.03                       |
| BC <sub>2-800-1</sub>   | 1176                                 | 0.69                                  | 51                          | 1.23                       |
| BC <sub>2-800-2</sub>   | 1521                                 | 1.42                                  | 50                          | 1.17                       |
| BC <sub>2-800-4</sub>   | 1645                                 | 1.72                                  | 14                          | 4.37                       |
| BC <sub>2-800-6</sub>   | 1609                                 | 1.97                                  | 8                           | 3.68                       |
| BC <sub>1-800-4</sub>   | 1331                                 | 1.64                                  | 27                          | 3.79                       |
| BC <sub>2-800-4</sub>   | 1645                                 | 1.72                                  | 14                          | 4.37                       |
| BC <sub>3-800-4</sub>   | 1711                                 | 1.86                                  | 12                          | 4.84                       |
| BC <sub>2-400-4</sub>   | 1342                                 | 1.09                                  | 52                          | 1.54                       |
| BC <sub>2-600-4</sub>   | 1407                                 | 1.48                                  | 31                          | 3.79                       |
| BC <sub>2-800-4</sub>   | 1645                                 | 1.72                                  | 14                          | 4.37                       |
| BC <sub>2-1000-4</sub>  | 1707                                 | 1.73                                  | 9                           | 4.84                       |

**Table S4**Kinetic parameters for TC adsorption on BC<sub>2-800-4</sub> in different initial concentrations.

| Kinetic model and parameters                      | C <sub>0</sub> (mg/L) |                       |                       |
|---------------------------------------------------|-----------------------|-----------------------|-----------------------|
|                                                   | 120                   | 200                   | 500                   |
| q <sub>e.exp</sub> (mg/g)                         | 594.50                | 874.70                | 1127.00               |
| <b><i>Pseudo-first-order- dynamics model</i></b>  |                       |                       |                       |
| q <sub>e.cal</sub> (mg/g)                         | 588.20                | 838.50                | 1090.00               |
| K <sub>1</sub> g/(mg·min)                         | 0.4773                | 0.2818                | 0.3576                |
| R <sup>2</sup>                                    | 0.8554                | 0.8525                | 0.7645                |
| <b><i>Pseudo-second-order- dynamics model</i></b> |                       |                       |                       |
| q <sub>e.cal</sub> (mg/g)                         | 596.50                | 866.30                | 1111.50               |
| K <sub>2</sub> g/(mg·min)                         | 1.50×10 <sup>-3</sup> | 0.62×10 <sup>-3</sup> | 0.57×10 <sup>-3</sup> |
| R <sup>2</sup>                                    | 0.9694                | 0.9668                | 0.9719                |
| <b><i>Elovich</i></b>                             |                       |                       |                       |
| a                                                 | 1.23×10 <sup>6</sup>  | 3.01×10 <sup>6</sup>  | 2.28×10 <sup>6</sup>  |
| b                                                 | 0.0260                | 0.0190                | 0.0140                |
| R <sup>2</sup>                                    | 0.7959                | 0.8668                | 0.9107                |
| <b><i>Intraparticle diffusion model</i></b>       |                       |                       |                       |
| K <sub>i1</sub> mg/(g min <sup>1/2</sup> )        | 87.43                 | 104.30                | 105.50                |
| C <sub>1</sub>                                    | 240.90                | 352.80                | 605.50                |
| R <sub>1</sub> <sup>2</sup>                       | 0.9872                | 0.9836                | 0.9985                |
| K <sub>i2</sub> mg/(g min <sup>1/2</sup> )        | 7.4360                | 15.7700               | 20.1600               |
| C <sub>2</sub>                                    | 530.90                | 725.70                | 946.70                |
| R <sub>2</sub> <sup>2</sup>                       | 0.8663                | 0.8888                | 0.9836                |
| K <sub>i3</sub> mg/(g min <sup>1/2</sup> )        | 0.2527                | 0.4029                | 1.1060                |
| C <sub>3</sub>                                    | 588.70                | 864.70                | 1099.10               |
| R <sub>3</sub> <sup>2</sup>                       | 0.8127                | 0.9709                | 0.8393                |

**Table S5**Isotherm parameters for TC adsorption on BC<sub>2-800-4</sub>

| Models and parameters                       | 293 K                 | 303 K                 | 313 K                 |
|---------------------------------------------|-----------------------|-----------------------|-----------------------|
| <b>Langmuir</b>                             |                       |                       |                       |
| $q_m$ (mg/g)                                | 954.81                | 1026.20               | 1061.90               |
| $K_L$ (L/mg)                                | 0.4237                | 0.7066                | 0.7833                |
| $R^2$                                       | 0.7048                | 0.7679                | 0.7443                |
| <b>Freundlich</b>                           |                       |                       |                       |
| $K_F$ (mg <sup>1-n</sup> L <sup>n</sup> /g) | 532.39                | 613.62                | 628.98                |
| $1/n_F$                                     | 0.1244                | 0.1109                | 0.1136                |
| $R^2$                                       | 0.9881                | 0.9915                | 0.9964                |
| <b>Temkin</b>                               |                       |                       |                       |
| $K_T$ (L/g)                                 | 242.25                | 544.57                | 550.04                |
| $b_T$ (J/mol)                               | 26.53                 | 27.76                 | 27.19                 |
| $R^2$                                       | 0.9653                | 0.9903                | 0.9926                |
| <b>Dubinin–Radushkevich</b>                 |                       |                       |                       |
| $Q_d$ (mg/g)                                | 915.06                | 983.38                | 1022.49               |
| $\beta$ (mol <sup>2</sup> /J <sup>2</sup> ) | $3.42 \times 10^{-3}$ | $1.47 \times 10^{-3}$ | $1.10 \times 10^{-3}$ |
| $R^2$                                       | 0.6054                | 0.6436                | 0.6707                |

**Table S6**

Comparison of the equilibrium adsorption of the BC<sub>2-800-4</sub> with other Biochar adsorbents for TC removal.

| Adsorbents                | activator                      | Adsorbates          | q <sub>max</sub> (mg/g) | BET Surface Area (m <sup>2</sup> /g) | Activation Temperature (°C) | References   |
|---------------------------|--------------------------------|---------------------|-------------------------|--------------------------------------|-----------------------------|--------------|
| NCES <sub>800-1-0.5</sub> | NaHCO <sub>3</sub>             | tetracycline        | 154.45                  | 379                                  | 800                         | 1            |
| HSBB600                   | -                              | tetracycline        | 94.69                   | 319                                  | 600                         | 2            |
| Fe-BCK0.5-VB6             | KOH                            | tetracycline        | 70.80                   | 455                                  | 700                         | 3            |
| MSBC                      | NaOH                           | tetracycline        | 98.33                   | 165                                  | 300                         | 4            |
| ACS <sub>300-1</sub>      | H <sub>3</sub> PO <sub>4</sub> | tetracycline        | 227.30                  | 464                                  | 300                         | 5            |
| activated BC              | NaOH                           | tetracycline        | 274.80                  | 960                                  | 500                         | 6            |
| SABC-700                  | -                              | tetracycline        | 412.95                  | 171                                  | 700                         | 7            |
| GSP-BC                    | KOH                            | tetracycline        | 1911.80                 | 3686                                 | 800                         | 8            |
| Zn-BC                     | ZnCl <sub>2</sub>              | tetracycline        | 93.44                   | 852                                  | 700                         | 9            |
| ZBAB                      | ZnCl <sub>2</sub>              | ciprofloxacin       | 250.00                  | 1223                                 | 700                         | 10           |
| activated BC              | ZnCl <sub>2</sub>              | Malachite green dye | 90.10                   | 51                                   | 800                         | 11           |
| ZnVB1-1                   | ZnCl <sub>2</sub>              | Cr (VI)             | 236.81                  | 940                                  | 700                         | 12           |
| Zn2PT350-700              | ZnCl <sub>2</sub>              | methylene blue      | 590.20                  | 877                                  | 700                         | 13           |
| BC <sub>2-800-4</sub>     | ZnCl <sub>2</sub>              | tetracycline        | 1122.20                 | 1645                                 | 800                         | Present work |

**Table S7**Adsorption thermodynamic parameters for TC adsorption on BC<sub>2-800-4</sub>

|    | Temperature (K) | $\Delta G^0$ (kJ/mol) | $\Delta H^0$ (kJ/mol) | $\Delta S^0$ (J/(mol · K)) |
|----|-----------------|-----------------------|-----------------------|----------------------------|
|    | 293             | -14.31                |                       |                            |
| TC | 303             | -16.33                | 30.95                 | 154.94                     |
|    | 313             | -17.42                |                       |                            |

## References

1. Z. Zhang, Y. Li, L. Ding, J. Yu, Q. Zhou, Y. Kong and J. Ma, *Bioresour. Technol.*, 2021, **330**, 124949.
2. H. Liu, G. Xu and G. Li, *Sci. Total Environ.*, 2020, **747**, 141492.
3. Y. Mu, W. He and H. Ma, *Bioresour. Technol.*, 2021, **342**, 126001.
4. J. Dai, X. Meng, Y. Zhang and Y. Huang, *Bioresour. Technol.*, 2020, **311**, 123455.
5. Q. Yang, P. Wu, J. Liu, S. Rehman, Z. Ahmed, B. Ruan and N. Zhu, *Environ. Res.*, 2020, **181**, 108899.
6. H. M. Jang and E. Kan, *Bioresour. Technol.*, 2019, **274**, 162-172.
7. X. Sheng, J. Wang, Q. Cui, W. Zhang and X. Zhu, *Environ. Res.*, 2022, **207**, 112175.
8. S. Liu, M. Pan, Z. Feng, Y. Qin, Y. Wang, L. Tan and T. Sun, *New Journal of Chemistry*, 2020, **44**, 1097-1106.
9. L. Yan, Y. Liu, Y. Zhang, S. Liu, C. Wang, W. Chen, C. Liu, Z. Chen and Y. Zhang, *Bioresour. Technol.*, 2020, **297**, 122381.
10. T. B. Nguyen, Q. M. Truong, C. W. Chen, W. H. Chen and C. D. Dong, *Bioresour. Technol.*, 2022, **351**, 127043.
11. L. Das, S. Sengupta, P. Das, A. Bhowal and C. Bhattacharjee, *Surf. Interfaces.*, 2021, **23**, 100985.
12. K. Ding, X. Zhou, H. Hadiatullah, Y. Lu, G. Zhao, S. Jia, R. Zhang and Y. Yao, *J Hazard Mater*, 2021, **420**, 126551.
13. F. Zhao, R. Shan, W. Li, Y. Zhang, H. Yuan and Y. Chen, *ACS Omega*, 2021, **6**, 34712-34723.
